# Supplementary material for: Tele-UPCAT: study protocol of a randomised controlled trial of a home-based Tele-monitored UPper limb Children Action observation Training for participants with unilateral cerebral palsy
Source: PubMed Central journal article supplement — BMJ Open. 2018 May 14;8(5):e017819. doi: 10.1136/bmjopen-2017-017819 (PMC5961615; doi:10.1136/bmjopen-2017-017819), 2018-05-14
Supplement: bmjopen-2017-017819supp002.pdf [file bmjopen-2017-017819supp002.pdf]

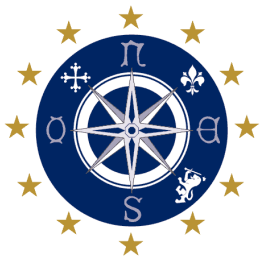

# FONDAZIONE STELLA MARIS - IRCCS

ISTITUTO DI RICOVERO E CURA A CARATTERE SCIENTIFICO  
OSPEDALE DI RILIEVO NAZIONALE E DI ALTA SPECIALIZZAZIONE  
PER LA NEUROPSICHIATRIA DELL'INFANZIA E DELL'ADOLESCENZA  
ISTITUTO DI RIABILITAZIONE PER PATOLOGIE NEUROPSICHIATRICHE

#### PRESIDENTE

Avv. Giuliano Maffei  
segreteria: Tel. 050 886269

#### DIRETTORE GENERALE

Dott. Roberto Cutajar  
segreteria: Tel. 050 886271

#### DIRETTORE SCIENTIFICO

Prof. Giovanni Cioni  
segreteria: Tel. 050 886233

#### DIRETTORE SANITARIO

Dott. Giuseppe De Vito  
segreteria: Tel. 050 886277

#### DIPARTIMENTO OSPEDALIERO

segreteria: Tel. 050 886229

#### Sede Amministrativa:

56128)  
Viale del Tirreno, 341/A-B-C  
angolo Via dei Frassini, 1  
Partita Iva 0012624 050 6

#### Centralino:

Tel. 050 886111  
Fax 050 886202  
sito web: [www.fsm.unipi.it](http://www.fsm.unipi.it)

#### Sede Legale:

56027 SAN MINIATO (PISA)  
Piazza della Repubblica, 13

#### ISTITUTO DI RIABILITAZIONE

CALAMBRONE (PISA)  
Tel. 050 886236

#### ISTITUTO DI RIABILITAZIONE

RESIDENZA SANITARIA  
Montalto di Fauglia (PISA)  
Tel. 050 886620

#### ISTITUTO DI RIABILITAZIONE

RESIDENZA SANITARIA  
"Casa Verde" S. Miniato (PISA)  
Tel. 050 886661-0571 43289

#### CENTRO DIURNO DI

RIABILITAZIONE PSICHIATRICA  
La Scala di San Miniato (PI)  
Tel. 0571 419868

## **MODULO INFORMATIVO PER GENITORI/TUTORE LEGALE**

*Versione 5.0 del 10/11/2016*

**Titolo Protocollo:** *Action-Observation Training (AOT) per la riabilitazione a domicilio di soggetti con emiplegia*

**Versione e data** V 5.0 del 10/11/2016

**Promotore dello studio:** IRCCS Fondazione Stella Maris, Viale del Tirreno, 331. Calambrone (PI)

**Sperimentatore Principale:** Dr.ssa Giuseppina Sgandurra, IRCCS Fondazione Stella Maris; Viale del Tirreno 331; 56128 Calambrone (Pisa), Italia Tel 050/886233. e-mail: [gsgandurra@fsm.unipi.it](mailto:gsgandurra@fsm.unipi.it)

Gentili Genitori/Tutore,

**Le informazioni contenute nella scheda informativa seguente sono dettagliate e potrebbero risultare molto complesse.**

**Le chiediamo di accettare la partecipazione allo studio solo dopo avere letto con attenzione questo foglio informativo ed avere avuto un colloquio esauriente con il medico sperimentatore che le dovrà dedicare il tempo necessario per comprendere completamente ciò che le viene proposto.**

Vostro/a figlio/a potrebbe essere idoneo a partecipare ad uno studio promosso dall'IRCCS Fondazione Stella Maris.

Questo modulo fornisce informazioni importanti riguardanti gli scopi, i rischi e i possibili benefici di questo studio. Se qualche aspetto di questo modulo non vi risultasse chiaro, potrete porre domande ai medici sperimentatori coinvolti dello studio. Prendetevi tutto il tempo necessario. La partecipazione di vostro/a figlio/a è volontaria e potrete ritirarla in qualsiasi momento.

Una volta che avrete letto questo modulo, avrete ricevuto risposta alle eventuali domande, e qualora decideste di far prendere parte vostro/a figlio/a allo studio, vi sarà chiesto di firmare un modulo di consenso, di cui riceverete una copia cartacea.

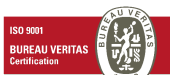

**Cosa si propone lo studio**

Vostro/a figlio/a è stato/a invitato/a a partecipare a questo studio per valutare la fattibilità e l'efficacia dell' Action Observation Training (AOT) rispetto alla standard care nella riabilitazione a domicilio dell'arto superiore in bambini con emiplegia.

Un secondo obiettivo sarà quello di misurare e monitorare i movimenti degli arti superiori tramite l'uso di attigrafi, strumenti semplici commerciali tipo orologi (vedi oltre), i cui dati verranno comparati con i risultati clinici.

### ***Che cosa è l'AOT***

La recente scoperta del Sistema dei Neuroni Specchio (SNS) ha favorito lo sviluppo dell' Action-Observation Training (AOT), una terapia che si basa sul ruolo dell'osservazione di azioni significative seguita dalla loro esecuzione come modello per l'apprendimento.

L'AOT è stato utilizzato con risultati promettenti in alcuni studi su pazienti adulti colpiti da ictus, recenti studi su bambini affetti da Paralisi Cerebrale Infantile indicano alcuni effetti positivi sulla funzione dell' arto superiore. In particolare, l'IRCCS Fondazione Stella Maris (FSM) ha negli anni scorsi effettuato in un gruppo di 24 bambini con emiplegia uno studio sull' AOT, **Errore. L'origine riferimento non è stata trovata.**I dati preliminari di tale studio supportano l'ipotesi che una riabilitazione intensiva basata sull' AOT è in grado di migliorare le attività con gli arti superiori dei bambini con emiplegia. Sulla base di tali promettenti risultati è stato proposto il presente studio.

La selezione dei soggetti e la sperimentazione clinica dei casi avverrà a cura della FSM.

Si intende selezionare 20 bambini/adulti di età compresa tra 5-20 anni affetti da paralisi cerebrale infantile a tipo emiplegia con predominante quadro di spasticità che interferisce con la funzione dell'arto superiore; sufficiente capacità di cooperazione e di comprensione nelle attività da proporre; genitori o tutori legali o soggetti adulti con emiplegia disponibili a collaborare ad un programma riabilitativo intensivo domiciliare di 3 settimane consecutive.

Il reclutamento avverrà solo dopo firma del consenso alla partecipazione da parte dei soggetti e se minorenni anche dei genitori o tutori.

I soggetti arruolati saranno divisi in modo random (ossia casuale) in due gruppi: sperimentale e standard care/controllo. I soggetti allocati nel gruppo sperimentale inizieranno subito con l'AOT per un periodo di 3 settimane, mentre quelli del controllo o standard care proseguiranno quanto normalmente eseguono facendo un diario delle eventuali attività riabilitative che conducono.

Tutti i bambini saranno valutati prima (T0) e dopo (T1) il periodo di training sperimentale/standard care con scale e test standardizzati. Al termine di tale periodo a quei bambini che non hanno effettuato il training sperimentale sarà data l'opportunità di effettuare il training. Il training sarà proposto con le stesse modalità del precedente e durerà 4 settimane; a termine delle quali i bambini di questo gruppo saranno rivalutati con scale e test standardizzati (T1 plus). Tutti i bambini saranno rivalutati anche dopo 8 settimane da T1 (T2) e dopo 16 settimane da T1 (T3).

Le valutazioni saranno effettuate allo scopo di valutare gli effetti del training nel breve tempo (T1 e T1 plus) e nel medio (T2) e lungo tempo (T3). Per dettagli vedi Disegno dello studio Figura 1.

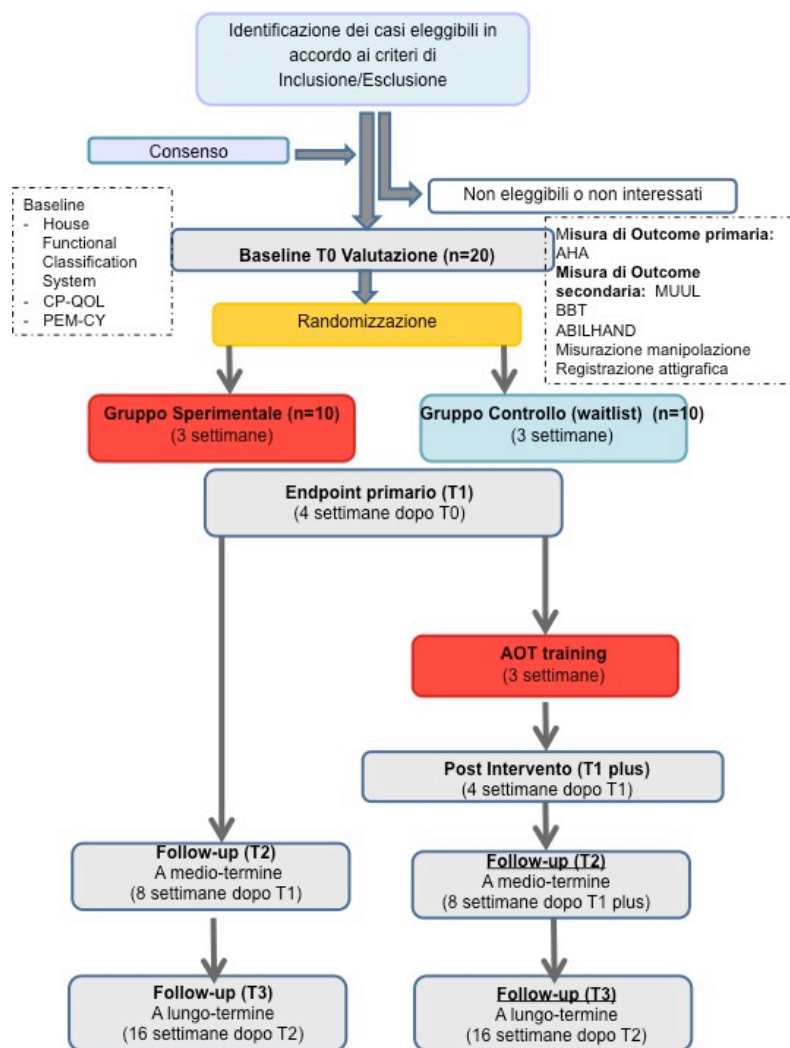

Figura 1: Disegno dello studio Clinico

Riassumendo tutti i bambini arruolati saranno valutati con scale e test standardizzati in tempi differenti:

T0, T1, T2, T3.

- T0: nella settimana precedente all'avvio del training/standard care
- T1: nella settimana successiva al primo periodo di training sperimentale/standard care
- T1 plus: nella settimana successiva al training sperimentale. Questa valutazione sarà effettuata solo dal gruppo di soggetti che effettuerà il training nella seconda fase.
- T2: 8 settimane dalla fine del training sperimentale
- T3: 16 settimane dopo T2.

Il training di AOT sarà effettuato tramite piattaforma dedicata e personalizzata che verrà consegnata a casa insieme al materiale da utilizzare. Il trattamento verrà effettuato dai bambini, con la supervisione dei genitori, durerà circa un'ora al giorno per 5 giorni alla settimana per 3 settimane successive (totale di 15 giorni). I primi due/tre giorni del training un terapeuta coadiuverà a domicilio i genitori o i soggetti emplegici adulti nella gestione del training.

Durante le tre le settimane di training verrà inoltre chiesto ai soggetti arruolari di indossare degli attigrafi commerciali (Figura 1) tutti i giorni per il maggior tempo possibile.

I bambini che inizialmente verranno allocati nel gruppo controllo o standard care sarà chiesto di mantenere un diario delle eventuali attività riabilitative che conducono normalmente e sarà chiesto di indossare gli attigrafi tutti i giorni per il maggior tempo possibile, come i bambini allocati al gruppo sperimentale.

Sarà chiesto di mantenere gli attigrafi anche nelle 3 settimane successive alla fine del training.

L'attigrafo è un sensore accelerometrico di movimento non invasivo che si indossa al polso come un orologio, è confortevole e resistente all'acqua. Oggigiorno gli attigrafi commerciali sono diventati strumenti di tendenza in uso da giovani ed adulti per il monitoraggio dell'attività fisica e del consumo calorico quotidiano. Il modello utilizzato nel presente studio è riportato nella foto di seguito.

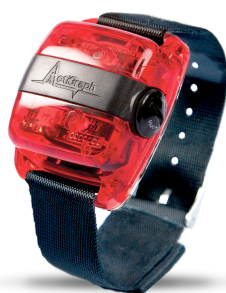

Figura 2: wGT3X-BT

Il reclutamento avverrà solo dopo la firma del consenso informato.

Al reclutamento saranno acquisiti alcuni dati clinici (tra cui età, sesso, caratteristiche della lesione cerebrale, lato plegico, livello di funzionalità manuale all'House Functional Classification System) e sarà creato un apposito database.

A tutela della privacy e dell'anonimato a ciascun soggetto sarà assegnato un codice numerico che verrà conservato in forma separata, in questo modo il database non conterrà nessun dato identificativo del soggetto. L'accesso a tali dati sarà limitato al solo personale direttamente coinvolto nello studio e tutti i dati verranno trattati in forma anonima.

### **Cosa comporta la partecipazione allo studio**

Lo studio avrà una durata totale di 12 mesi, durante tale periodo saranno arruolati presso l'IRCCS Fondazione Stella Maris un gruppo di 20 bambini/adolescenti e giovani adulti (5-20 anni) con emiplegia congenita. La partecipazione sarà su base volontaria, previa firma del consenso informato. Lo studio prevederà un intervento riabilitativo della funzione manuale a domicilio tramite una piattaforma costruita ad hoc che consentirà di effettuare un training personalizzato di AOT.

Lo studio prevede lo svolgimento di test e questionari clinici, normalmente impiegati per la valutazione funzionale dell'emiplegia congenita:

Il protocollo consisterà nei seguenti test:

1- Assisting Hand Assessment (AHA) una scala, che attraverso la proposta di attività ludico-ricreative, consente di valutare la funzionalità manuale e bimanuale.

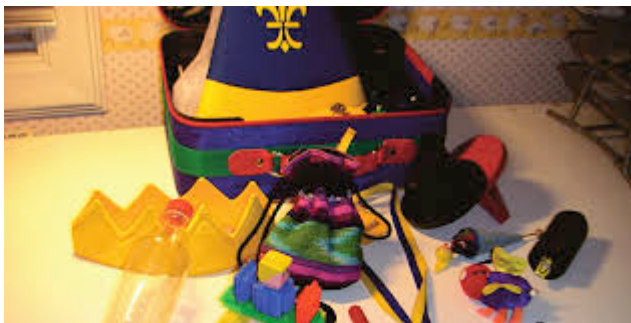

2- Box and Block Test (BBT) E' una misura per la valutazione della destrezza manuale in cui viene richiesto prima con una mano poi con l'altra di spostare i cubi da un lato della scatola all'altro in 60 secondi.

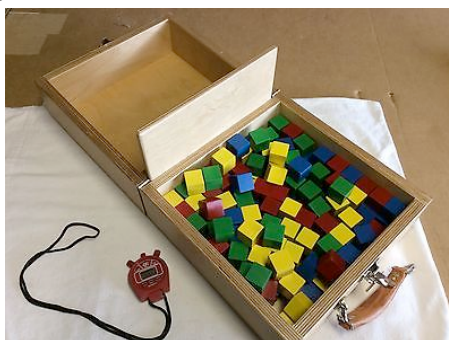

3- *Melbourne Assessment of Upper Limb Function (MUUL)*. Si tratta di uno strumento standardizzato per la misurazione della capacità e qualità di movimento dell'arto superiore nei bambini con Paralisi Cerebrale Infantile di età compresa tra i 2 e i 15 anni. Verrà utilizzato a tutti i tempi di valutazione.

4- *L'ABILHAND-Kids* è un breve questionario, validato in bambini con paralisi cerebrale infantile dai 6 ai 15 anni che misura 21 principali attività quotidiane bimanuali. Il punteggio viene assegnato da un genitore in base alla difficoltà che ha il bambino a compiere quotidianamente l'attività richiesta con un punteggio su 3 punti (impossibile, difficile, facile). Verrà utilizzato a tutti i tempi di valutazione.

5- *Participation and Environment Measure - Children and Youth (PEM-CY)*. Si tratta di una misura di participation e di fattori ambientali a casa, a scuola e nella comunità. Verrà utilizzato a T0 e a T3.

6- *Cerebral Palsy Quality of Life Questionnaire for Children (CP QOL –Child, 4-12 years) and Cerebral Palsy Quality of Life Questionnaire for Adolescents (CP QOL –Teen, 13-18 years)*. Si tratta di questionari per la valutazione della qualità della vita nei bambini ed adolescenti con paralisi cerebrale infantile. Verrà utilizzato a T0 e a T3.

7- *Misurazione strumentale della manipolazione durante task uni e bimanuali eseguiti dopo osservazione.* Si tratta di un oggetto contenente due celle di carico per misurare la forza esercitata (in compressione o trazione) quando viene afferrato dalla mano plegica e uno switch on-off per valutare il contatto della mano sana. Un ulteriore switch è posizionato sul punto di partenza sul tavolo sotto la mano plegica per registrare il momento in cui inizia il suo movimento verso l'oggetto. Lo strumento viene utilizzato subito dopo la visione di tre task di manipolazione effettuati con tre diversi tipi di presa: un task unimanuale effettuato con la mano plegica, un task bimanuale sincrono tra le due mani ed un task bimanuale di cooperazione tra le due mani.

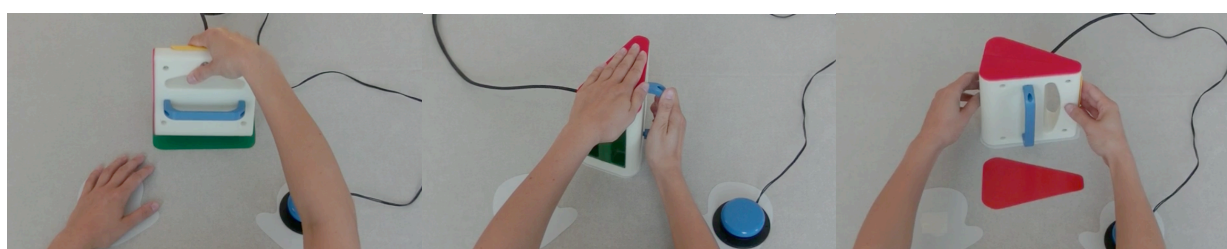

TASK 1.

TASK 2.

TASK 3.

L'intera valutazione durerà circa un'ora.

8- *Uso dell'attigrafo nella vita quotidiana.* I soggetti reclutati che saranno disponibili ad indossare l'attigrafo (Figura 2) al di fuori della valutazione clinica sarà chiesto di indossare 2 attigrafi ai polsi (uno per ciascun polso) per periodi di tre settimane (fase sperimentale AOT, fase controllo, fase di follow-up). Al termine del periodo di registrazione gli attigrafi si spengeranno da soli e saranno riconsegnati direttamente o tramite posta allo sperimentatore.

### **Benefici derivanti dalla partecipazione allo studio**

Sulla base dei dati della letteratura e sui risultati preliminari ottenuti presso il Ns Istituto si prevede, grazie al training di AOT, un possibile miglioramento funzionale nell'utilizzo dell'arto superiore nelle attività di vita quotidiana.

### **Possibili rischi**

Non si prevedono rischi diretti dalla partecipazione allo studio.

### **Possibili alternative**

L'alternativa è non partecipare allo studio.

### **Che cosa succede se decidete di non prendere parte allo studio o di ritirarvi dallo studio**

La partecipazione allo studio è volontaria. Se doveste decidere di non prendere parte allo studio, o in caso doveste cambiare idea in seguito, vostro/a figlio/a non subirà alcuna penalità o perdita di benefici ai quali avrebbe altrimenti diritto. Le sue cure mediche attuali e future presso l'IRCCS

Fondazione Stella Maris non saranno compromesse dalla vostra decisione ed i medici continueranno a seguirlo/a con la dovuta attenzione.

Potrete ritirare l'adesione di vostro/a figlio/a allo studio in un qualsiasi momento dandone comunicazione al medico dello studio, alla Dr.ssa Giuseppina Sgandurra, senza fornire alcuna giustificazione. In tal caso non saranno raccolti ulteriori dati che lo/a riguardano e potrete chiedere la cancellazione di quelli già raccolti.

#### **Procedure previste alla fine dello studio**

Non è prevista alcuna procedura da attuarsi alla fine dello studio.

#### **Informazione del medico di medicina generale /pediatra di libera scelta**

Per la migliore tutela della salute di vostro/a figlio/a, vi verrà chiesto di informare il medico di medicina generale/pediatra di libera scelta della sperimentazione alla quale accettate di far partecipare vostro/a figlio/a.

#### **Informazioni sui risultati dello studio**

Qualora foste interessati, potrete chiedere al medico di comunicarvi i risultati generali dello studio ed in particolare quelli che riguardano vostro/a figlio/a.

---

### **INFORMAZIONI IN MERITO AL TRATTAMENTO DEI DATI PERSONALI:**

#### **Titolari del trattamento e relative finalità**

Il Centro di sperimentazione IRCCS Fondazione Stella Maris e in accordo alle responsabilità previste dalle norme della buona pratica, tratteranno i dati personali di Suo Figlio/a, in particolare quelli sulla salute e, soltanto nella misura in cui sono indispensabili in relazione all'obiettivo dello studio, altri dati relativi alla Sua origine ed alle caratteristiche della sua condizione medica solo esclusivamente in funzione della realizzazione dello studio. A tal fine i dati indicati saranno raccolti dal Centro di sperimentazione e trattati in modo anonimo e a tutela della privacy. Il trattamento dei dati personali relativi all'età, sesso, lato plegico/dominanza manuale, funzionalità manuale, attività quotidiane svolte, dati provenienti dalle registrazioni attigrafiche sono indispensabili allo svolgimento dello studio: il rifiuto di conferirli non Le consentirà di parteciparvi.

#### **Natura dei dati**

Il medico che La seguirà nello studio La identificherà con un codice: i dati che La riguardano raccolti nel corso dello studio, ad eccezione del Suo nominativo, saranno registrati, elaborati e conservati, per almeno 7 (sette) anni dalla conclusione dello studio, unitamente a tale codice, alla Sua data di nascita, l'età, sesso, lato plegico/dominanza manuale, funzionalità manuale, attività quotidiane svolte, dati provenienti dalle registrazioni attigrafiche sono necessari allo svolgimento dello studio. Soltanto il medico e i soggetti autorizzati potranno collegare questo codice al Suo nominativo.

### **Modalità del trattamento**

I dati, trattati mediante strumenti anche elettronici, saranno diffusi solo in forma rigorosamente anonima, ad esempio attraverso pubblicazioni scientifiche, statistiche e convegni scientifici. La partecipazione di Suo figlio/a allo studio implica che il Comitato etico e le autorità sanitarie italiane e straniere potranno conoscere i dati che La riguardano, contenuti anche nella Sua documentazione clinica originale, con modalità tali da garantire la riservatezza della Sua identità.

### **Esercizio dei diritti**

Potrà esercitare i diritti di cui all'art. 7 del Codice (es. accedere ai Suoi dati personali, integrarli, aggiornarli, rettificarli, opporsi al loro trattamento per motivi legittimi, ecc.) rivolgendosi direttamente al centro di sperimentazione nella persona della Dr.ssa Giuseppina Sgandurra , *IRCCS Fondazione Stella Maris, Viale del Tirreno 331*. Potrà interrompere in ogni momento e senza fornire alcuna giustificazione la partecipazione di Suo figlio/a allo studio. In tal caso, i campioni biologici a Lei correlati verranno distrutti. Non saranno inoltre raccolti ulteriori dati che riguardano Suo figlio/a, ferma restando l'utilizzazione di quelli eventualmente già raccolti per determinare, senza alterarli, i risultati della ricerca: anche per i dati già raccolti potrà eventualmente chiedere la cancellazione.

---

### **Ulteriori informazioni**

Non sono previsti costi aggiuntivi a vostro carico derivanti dalla partecipazione allo studio. Non riceverete alcun compenso economico per la partecipazione allo studio.

Il protocollo dello studio che vi è stato proposto è stato redatto in conformità alle Norme di Buona Pratica Clinica e alla Dichiarazione di Helsinki, ed è stato approvato dal Comitato Etico Pediatrico della Regione Toscana in data.....

Potrete segnalare qualsiasi fatto riteniate opportuno evidenziare, relativamente alla ricerca che riguarda vostro/a figlio/a, al Comitato Etico e/o alla Direzione sanitaria di questa struttura ospedaliera.

Per ulteriori informazioni e comunicazioni durante lo studio sarà a disposizione il seguente personale:

|          |                         |            |
|----------|-------------------------|------------|
| Dr.ssa . | Sgandurra               | Giuseppina |
| Telefono | 050/886233              |            |
| E.mail   | gsgandurra@fsm.unipi.it |            |



\_\_\_\_\_ / \_\_\_\_/\_\_\_\_  
\_\_\_\_\_  
Nome per esteso del medico che ha consegnato l'informativa                      Data                      Ora                      Firma

**CONSENSO INFORMATO PER GENITORI/TUTORE LEGALE**

Versione 5.0 del 10/11/2016

**Titolo Protocollo**

*Action-Observation Training (AOT) per la riabilitazione a domicilio di soggetti con emiplegia*

**Versione e data** V 5.0 del 10/11/2016

**Promotore dello studio:** IRCCS Stella Maris, Prof. Giovanni Cioni IRCCS Fondazione Stella Maris, Viale del Tirreno, 331. Calambrone (PI)

**Sperimentatore Principale:** Dr.ssa Giuseppina Sgandurra, IRCCS Fondazione Stella Maris; Viale del Tirreno 341/ ABC; 56128 Calambrone (Pisa), Italia Tel 050/886233.

e-mail: g.sgandurra@fsm.unipi.it

---

Io sottoscritta (madre/tutore) \_\_\_\_\_ nata il  
\_\_\_\_/\_\_\_\_/\_\_\_\_ residente a \_\_\_\_\_ via/piazza  
\_\_\_\_\_ Tel. \_\_\_\_\_ domicilio (se diverso dalla  
residenza) \_\_\_\_\_

Io sottoscritto (padre/tutore) \_\_\_\_\_ nata il  
\_\_\_\_/\_\_\_\_/\_\_\_\_ residente a \_\_\_\_\_ via/piazza  
\_\_\_\_\_ Tel. \_\_\_\_\_ domicilio (se diverso dalla  
residenza) \_\_\_\_\_

del minore \_\_\_\_\_ nato il

\_\_\_/\_\_\_/\_\_\_

residente a \_\_\_\_\_ via/piazza

\_\_\_\_\_

dichiaro di aver ricevuto dal Dottor \_\_\_\_\_ esaurienti spiegazioni in merito alla richiesta di partecipazione alla ricerca in oggetto, secondo quanto riportato nella scheda informativa, della quale mi è stata consegnata una copia in data \_\_\_\_\_ alle ore \_\_\_\_\_ (indicare data e ora della consegna).

Dichiaro che mi sono stati chiaramente spiegati la natura, le finalità, le procedure, i benefici attesi, i rischi e gli inconvenienti possibili e le alternative dello studio clinico.

**DICHIARO** inoltre che:

1. ho letto e compreso il foglio informativo fornito riguardo il progetto di ricerca e facente parte di questo consenso;
2. mi è stata data l'opportunità di porre qualsivoglia domanda allo sperimentatore dello studio e ho avuto risposte soddisfacenti;
3. mi è stato concesso il tempo sufficiente per riflettere sulle informazioni ricevute e per discuterne con terzi;
4. sono stato/a informato/a che il protocollo dello studio e tutti i moduli utilizzati hanno avuto il parere favorevole del Comitato Etico Pediatrico;
5. mi è stato chiaramente spiegato che posso decidere che il/la minore non prenda parte allo studio o ne esca in qualsiasi momento, senza fornire giustificazione, e che tali decisioni non modificheranno in alcun modo i rapporti con i medici curanti e con la struttura presso la quale sono in cura;
6. sono consapevole che la ricerca potrà essere interrotta in ogni momento, per decisione del responsabile della ricerca, senza pregiudizio per la salute del/della minore;
7. sono stato informato/a che sarò messo al corrente di qualsiasi nuovo dato che possa compromettere la sicurezza della ricerca e che, per ogni problema o per ulteriori domande, potrò rivolgermi ai medici presso i quali il/la minore è in cura;
8. per la migliore tutela della salute del/la minore, sono consapevole dell'importanza (e della mia responsabilità) di informare il medico di medicina generale/pediatra di libera scelta della sperimentazione alla quale accetto di far partecipare il/la minore; nel caso decida di non informarlo, esonero sia il mio medico curante che i medici che mi seguono nella sperimentazione dalla responsabilità per i danni che possano derivare dall'incompatibilità tra il(i) farmaco(i) in studio ed altri trattamenti medici;

9. sono stato informato/a che i risultati dello studio saranno resi noti alla comunità scientifica, tutelando l'identità del minore secondo la normativa vigente sulla privacy.

10. sono consapevole che devo/dobbiamo ricevere una copia del presente modulo di consenso.

Sottoscrivendo questo modulo acconsento al trattamento dei dati personali di mio figlio/a e al loro trasferimento al di fuori dell'Unione europea (*da inserire se effettuato specificando gli estremi identificativi dei destinatari*) per gli scopi della ricerca nei limiti e con le modalità indicate nell'informativa fornitami con il presente documento.

**DICHIARO pertanto di:**

**volere**       **NON volere**

che il minore partecipi alla  sola fase di valutazione clinica  
 sia alla fase di valutazione clinica che a domicilio

**volere**       **NON volere**

essere informati sui risultati della ricerca dal medico dello studio, anche in relazione alle notizie inattese che dovessero essere accidentalmente riscontrate con le indagini previste dallo studio

**volere**       **NON volere**

informare il pediatra di libera scelta/medico di medicina generale della partecipazione allo studio (*è preferibile il suo coinvolgimento*)

|                                               |             |       |       |
|-----------------------------------------------|-------------|-------|-------|
| _____                                         | __/__/_____ | _____ |       |
| Nome per esteso del minore                    | Data        | Ora   | Firma |
| _____                                         | __/__/_____ | _____ |       |
| Nome per esteso<br>del genitore/tutore legale | Data        | Ora   | Firma |
| _____                                         | __/__/_____ | _____ |       |
| Nome per esteso<br>del genitore/tutore legal  | Data        | Ora   | Firma |

| Io sottoscritto Prof./Dr. .... (Cognome) ..... (Nome) |

Dichiaro che i genitori/tutori legali del Paziente hanno firmato spontaneamente la sua partecipazione allo studio

Dichiaro inoltre di:

- aver fornito esaurienti spiegazioni in merito alle finalità dello studio, alle procedure, ai possibili rischi e benefici e alle possibili alternative;
- aver verificato che i genitori/tutore legale abbiano sufficientemente compreso le informazioni fornitegli
- aver lasciato ai genitori/tutore legale il tempo necessario e la possibilità di fare domande in merito allo studio
- non aver esercitato alcuna coercizione od influenza indebita nella richiesta del Consenso

\_\_\_\_\_ / / \_\_\_\_\_

Nome per esteso del medico  
che ha fornito le informazioni e  
raccolto il consenso informato

Data

Ora

Firma

**NOTA BENE**

una copia del presente modulo, firmato e datato, allegato alle "Modulo informativo per i genitori/tutore legale" dovrà essere consegnata ai genitori/tutori legali del Paziente

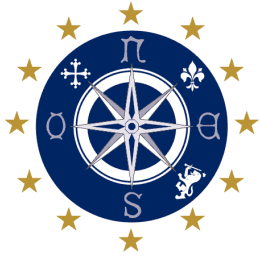

# FONDAZIONE STELLA MARIS - IRCCS

ISTITUTO DI RICOVERO E CURA A CARATTERE SCIENTIFICO  
OSPEDALE DI RILIEVO NAZIONALE E DI ALTA SPECIALIZZAZIONE  
PER LA NEUROPSICHIATRIA DELL'INFANZIA E DELL'ADOLESCENZA  
ISTITUTO DI RIABILITAZIONE PER PATOLOGIE NEUROPSICHIATRICHE

## PRESIDENTE

Avv. Giuliano Maffei  
segreteria: Tel. 050 886269

## DIRETTORE GENERALE

Dott. Roberto Cutajar  
segreteria: Tel. 050 886271

## DIRETTORE SCIENTIFICO

Prof. Giovanni Cioni  
segreteria: Tel. 050 886233

## DIRETTORE SANITARIO

Dott. Giuseppe De Vito  
segreteria: Tel. 050 886277

## DIPARTIMENTO OSPEDALIERO

segreteria: Tel. 050 886229

## Sede Amministrativa:

56128)  
Viale del Tirreno, 341/A-B-C  
angolo Via dei Frassini, 1  
Partita Iva 0012624 050 6

## Centralino:

Tel. 050 886111  
Fax 050 886202  
sito web: [www.fsm.unipi.it](http://www.fsm.unipi.it)

## Sede Legale:

56027 SAN MINIATO (PISA)  
Piazza della Repubblica, 13

## ISTITUTO DI RIABILITAZIONE CALAMBRONE (PISA)

Tel. 050 886236

## ISTITUTO DI RIABILITAZIONE RESIDENZA SANITARIA

Montalto di Fauglia (PISA)  
Tel. 050 886620

## ISTITUTO DI RIABILITAZIONE RESIDENZA SANITARIA

"Casa Verde" S. Miniato (PISA)  
Tel. 050 886661-0571 43289

## CENTRO DIURNO DI RIABILITAZIONE PSICHIATRICA

La Scala di San Miniato (PI)  
Tel. 0571 419868

## MODULO INFORMATIVO

### PER PAZIENTI DI ETÀ COMPRESA TRA 7 E 13 ANNI

Versione 6.0 del 29/11/2016

***Titolo Protocollo:*** Action-Observation Training (AOT) per la riabilitazione a domicilio di soggetti con emiplegia

***Versione e data*** V 6.0 del 29/11/2016

***Promotore dello studio:*** IRCCS Fondazione Stella Maris, Viale del Tirreno, 331. Calambrone (PI)

***Sperimentatore Principale:*** Dr.ssa Giuseppina Sgandurra, IRCCS Fondazione Stella Maris; Viale del Tirreno 331; 56128 Calambrone (Pisa), Italia Tel 050/886233. e-mail: [gsgandurra@fsm.unipi.it](mailto:gsgandurra@fsm.unipi.it)

### **Perché facciamo questo studio?**

La ricerca medica vuole migliorare la conoscenza sulle malattie.

Ti chiediamo di aiutarci a capire se l'uso di una terapia basata sull'osservazione può essere utile a migliorare la funzionalità del tuo braccio. La terapia basata sull'osservazione prevede la visione di brevi filmati, da osservare attentamente, che mostrano un'azione fatta con le mani e subito dopo ti verrà chiesto di eseguire lo stesso movimento cercando di imitarlo il più possibile.

Inoltre ti chiederemo di indossare ai polsi dei braccialetti simili ad un orologio per meglio misurare e monitorare i movimenti delle tue braccia.

### **Chi partecipa con me?**

Parteciperanno allo studio 20 bambini/ragazzi e giovani adulti di età compresa tra 5-20 anni. Tutti con difficoltà motorie simili alle tue.

### **Che succede se partecipo?**

Se decidi di partecipare allo studio verrai all'inizio assegnato in modo casuale ad uno dei due gruppi previsti nella prima fase dello studio: sperimentale o controllo. Se verrai assegnato al gruppo sperimentale ti sarà proposto di iniziare subito un ciclo di terapia basata sull'osservazione a casa mentre se verrai assegnato al gruppo controllo ti sarà proposto di aspettare circa 4 settimane prima di iniziare lo stesso ciclo di terapia e nel frattempo continuerai a fare quello che stai facendo ora. Dunque farai in ogni caso la terapia basata sull'osservazione ma o la farai subito o dovrai solo aspettare. In entrambi i casi ti sarà chiesto di indossare ai polsi dei braccialetti simili ad un orologio. La terapia che farai prima o dopo in pratica si basa su un programma al computer in cui "Ubi", un extraterrestre, ti aiuterà passo passo negli esercizi da fare.

Modulo informativo e di assenso per pazienti di età compresa tra 7 e 13 anni

Versione e data V 6.0 del 29/11/2016

Titolo: Action-Observation Training (AOT) per la riabilitazione a domicilio di soggetti con emiplegia

Inoltre ti saranno proposti, a dei tempi prestabiliti (quando ti arruoliamo, dopo che hai finito il trattamento o la fase di controllo, dopo che hai finito il trattamento se l'hai iniziato dopo, dopo 8 e dopo 16 settimane dalla fine del trattamento) dei giochi e dei questionari che ci aiutano a capire come usi le mani!

### **Quanto durerà lo studio?**

Lo studio durerà un anno. Se accetterai di prendere parte allo studio la tua partecipazione è di 3 settimane (durata del trattamento). Ti verrà inoltre chiesto di effettuare i giochi e di compilare i questionari 3 o 4 volte.

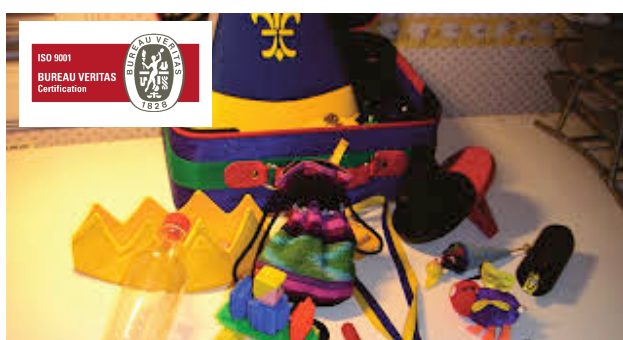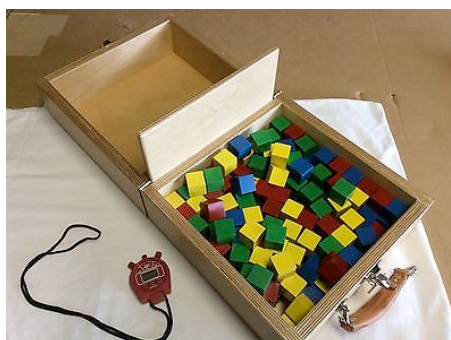

Alcuni esempi di giochi

### **Sono previsti benefici derivanti dalla mia partecipazione allo studio?**

Ci aspettiamo che questa terapia possa aiutarti a migliorare l'uso delle tue mani

### **Quali sono i rischi dello studio?**

Non sono previsti rischi in quanto si tratta di un trattamento molto semplice che potrai eseguire tranquillamente a casa e le valutazioni sono quelle che normalmente svolgi quanto vieni presso il nostro centro clinico.

### **Che cosa succede se decido di non prendere parte allo studio**

Sei completamente libero di aderire o meno allo studio. Se deciderai di non partecipare, continuerai ad essere seguito periodicamente dalla tua equipe di riferimento del nostro centro clinico così come fatto fino ad ora.

### **Devo fornire il mio consenso per partecipare allo studio?**

Una volta che avrai letto questo modulo e avrai ricevuto risposta alle tue domande, ti sarà chiesto di decidere se desideri partecipare allo studio. Se vorrai partecipare, dovrai firmare questo modulo di cui ti sarà data una copia.

Se decidi di non partecipare allo studio, o in caso dovessi cambiare idea in seguito, non succederà niente, continuerai a ricevere le cure a te necessarie presso questo ospedale.

### **E se dovessi avere delle domande?**

Modulo informativo e di assenso per pazienti di età compresa tra 7 e 13 anni

Versione e data V 6.0 del 29/11/2016

Titolo: Action-Observation Training (AOT) per la riabilitazione a domicilio di soggetti con emiplegia

Se hai delle domande puoi farle alla Dr.ssa Giuseppina Sgandurra durante il colloquio e potrai anche chiamarla al telefono al numero 050/886239: ti ascolterà e ti spiegherà tutto quello che desideri.

Data \_\_\_\_\_ ora \_\_\_\_\_ di consegna

\_\_\_\_\_ Firma del medico che ha consegnato l'informativa

---

**DICHIARAZIONE DI ASSENSO**  
**PER PAZIENTI DI ETA' COMPRESA TRA 7 E 13 ANNI**  
**Versione 6.0 del 29/11/2016**

**Titolo Protocollo:** *Action-Observation Training (AOT) per la riabilitazione a domicilio di soggetti con emiplegia*

**Versione e data** V 6.0 del 29/11/2016

**Promotore dello studio:** IRCCS Fondazione Stella Maris, Viale del Tirreno, 331. Calambrone (PI)

**Sperimentatore Principale:** Dr.ssa Giuseppina Sgandurra, IRCCS Fondazione Stella Maris; Viale del Tirreno 331; 56128 Calambrone (Pisa), Italia Tel 050/886233. e-mail: gsgandurra@fsm.unipi.it

---

Il modulo informativo mi è stato consegnato il (data) \_\_\_\_\_ alle ore \_\_\_\_\_

Ho capito tutto quello che il medico mi ha spiegato.

Il Dottore ha ascoltato tutte le mie domande ed ha saputo rispondermi.

Se in futuro avrò bisogno di qualcos'altro i medici dello studio saranno a mia disposizione.

\_\_\_\_\_  
Data e ora

\_\_\_\_\_  
Scrivi il tuo nome in stampatello qui se desideri partecipare allo studio

\_\_\_\_\_  
Firma del paziente. Scrivi il tuo nome in stampatello  
qui se desideri partecipare allo studio

\_\_\_\_\_  
Data/ora

\_\_\_\_\_  
Firma del medico che ha informato il paziente



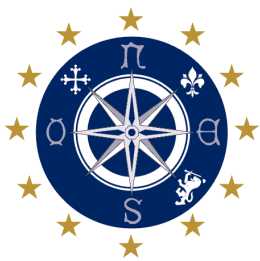

# FONDAZIONE STELLA MARIS - IRCCS

ISTITUTO DI RICOVERO E CURA A CARATTERE SCIENTIFICO  
OSPEDALE DI RILIEVO NAZIONALE E DI ALTA SPECIALIZZAZIONE  
PER LA NEUROPSICHIATRIA DELL'INFANZIA E DELL'ADOLESCENZA  
ISTITUTO DI RIABILITAZIONE PER PATOLOGIE NEUROPSICHIATRICHE

## PRESIDENTE

Avv. Giuliano Maffei  
segreteria: Tel. 050 886269

## DIRETTORE GENERALE

Dott. Roberto Cutajar  
segreteria: Tel. 050 886271

## DIRETTORE SCIENTIFICO

Prof. Giovanni Cioni  
segreteria: Tel. 050 886233

## DIRETTORE SANITARIO

Dott. Giuseppe De Vito  
segreteria: Tel. 050 886277

## DIPARTIMENTO OSPEDALIERO

segreteria: Tel. 050 886229

## Sede Amministrativa:

56128)  
Viale del Tirreno, 341/A-B-C  
angolo Via dei Frassini, 1  
Partita Iva 0012624 050 6

## Centralino:

Tel. 050 886111  
Fax 050 886202  
sito web: www.fsm.unipi.it

## Sede Legale:

56027 SAN MINIATO (PISA)  
Piazza della Repubblica, 13

ISTITUTO DI RIABILITAZIONE  
CALAMBRONE (PISA)

Tel. 050 886236

ISTITUTO DI RIABILITAZIONE  
RESIDENZA SANITARIA

Montalto di Fauglia (PISA)  
Tel. 050 886620

ISTITUTO DI RIABILITAZIONE  
RESIDENZA SANITARIA

“Casa Verde” S. Miniato (PISA)  
Tel. 050 886661-0571 43289

CENTRO DIURNO DI  
RIABILITAZIONE PSICHIATRICA  
La Scala di San Miniato (PI)  
Tel. 0571 419868

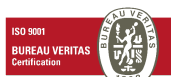

## **MODULO INFORMATIVO** **PER PAZIENTI DI ETÀ COMPRESA TRA 14 E 17 ANNI**

Versione 6.0 del 29/11/2016

***Titolo Protocollo:*** Action-Observation Training (AOT) per la riabilitazione a domicilio di soggetti con emiplegia

***Versione e data*** V 6.0 del 29/11/2016

***Promotore dello studio:*** IRCCS Fondazione Stella Maris, Viale del Tirreno, 331. Calambrone (PI)

***Sperimentatore Principale:*** Dr.ssa Giuseppina Sgandurra, IRCCS Fondazione Stella Maris; Viale del Tirreno 331; 56128 Calambrone (Pisa), Italia Tel 050/886233. e-mail: [gsgandurra@fsm.unipi.it](mailto:gsgandurra@fsm.unipi.it)

Caro/a .....,

potresti essere idoneo a partecipare ad uno studio proposto dall'IRCCS Fondazione Stella Maris.

Questo modulo fornisce informazioni riguardanti gli scopi, i rischi e i possibili benefici di questo studio. Se qualche aspetto di questo modulo non ti risultasse chiaro, puoi porre domande ai medici dello studio. Prenditi tutto il tempo necessario. Non sei obbligato a partecipare. Se accetti, potrai decidere di ritirare la tua partecipazione in qualsiasi momento.

Una volta che avrai letto questo modulo e avrai ricevuto risposta alle tue eventuali domande, ti sarà chiesto di decidere se desideri partecipare allo studio. Se vorrai partecipare, dovrai firmare il modulo di cui ti sarà data una copia.

### **Quale è lo scopo di questo studio?**

Sei stato/a invitato/a a partecipare a questo studio perché pensiamo che puoi aiutarci a capire se l'uso di una terapia basata sulla osservazione può essere utile a migliorare la funzionalità del tuo braccio. La terapia basata sull'osservazione prevede la visione di brevi filmati, da osservare attentamente, che mostrano una azione fatta con le mani e subito dopo ti verrà chiesto di eseguire lo stesso movimento cercando di imitarlo il più possibile.

Inoltre ti chiederemo di indossare ai polsi dei braccialetti simili ad un orologio per meglio misurare e monitorare i movimenti delle tue braccia.

### **Quante persone parteciperanno?**

Parteciperanno allo studio 20 bambini/ragazzi e giovani adulti di età compresa tra 5-20 anni. Tutti con difficoltà motorie simili alle tue.

### **Cosa comporta la partecipazione allo studio?**

Se decidi di partecipare allo studio verrai all'inizio assegnato in modo random (casuale) ad uno dei due gruppi previsti nella prima fase dello studio:

sperimentale o controllo. Se verrai assegnato al gruppo sperimentale ti sarà proposto di iniziare subito un ciclo di terapia basata sull'osservazione a casa mentre (durata 3 settimane) se verrai assegnato al gruppo controllo ti sarà proposto di aspettare circa 4 settimane prima di iniziare lo stesso ciclo di terapia e nel frattempo continuerai a fare quello che stai facendo ora. Dunque farai in ogni caso la terapia basata sull'osservazione ma o la farai subito o dovrai solo aspettare. In entrambi i casi ti sarà chiesto di indossare ai polsi dei braccialetti simili ad un orologio. La terapia che farai prima o dopo in pratica si basa su un programma al computer in cui "Ubi", un extraterrestre, ti aiuterà passo passo negli esercizi da fare. Lo studio durerà un anno. Se accetterai di prendere parte allo studio la tua partecipazione è di 3 settimane (durata del trattamento).

Inoltre ti saranno proposti, a dei tempi prestabiliti (T0: quando ti arruoliamo, T1: dopo che hai finito il trattamento o la fase di controllo, T1 plus: dopo che hai finito il trattamento se l'hai iniziato dopo, T2: dopo 8 e T3: dopo 16 settimane dalla fine del trattamento) dei giochi e dei questionari che ci aiutano a capire come usi le mani!

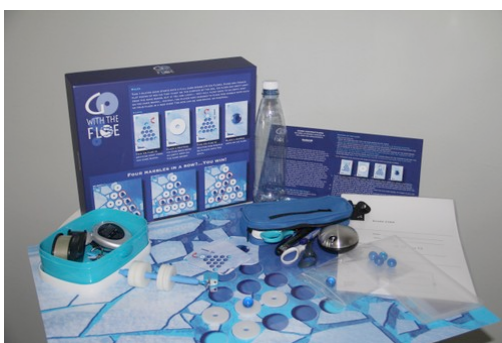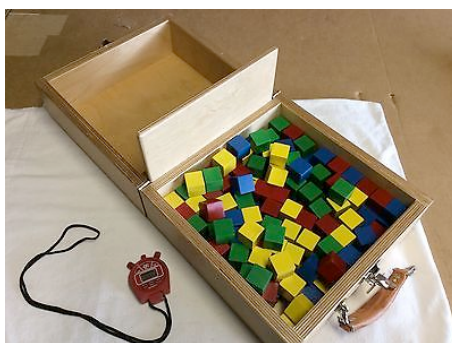

Alcuni esempi di giochi

### **Sono previsti benefici derivanti dalla mia partecipazione allo studio?**

Ci aspettiamo che questa terapia possa aiutarti a migliorare l'uso delle tue mani

### **Quali sono i rischi dello studio?**

Non sono previsti rischi in quanto si tratta di un trattamento molto semplice che potrai eseguire tranquillamente a casa e le valutazioni sono quelle che normalmente svolgi quanto vieni presso il nostro centro clinico.

### **Che cosa succede se decido di non prendere parte allo studio o di ritirarmi dallo studio?**

La tua partecipazione allo studio è volontaria.

Se decidi di non partecipare, o in caso dovessi cambiare idea in seguito, non subirai alcuna penalità o perdita di benefici ai quali avresti altrimenti diritto. Le tue cure mediche attuali e future presso l'IRCCS Fondazione Stella Maris non saranno compromesse dalla tua decisione ed i medici continueranno a seguirti con la dovuta attenzione.

Puoi ritirare la tua adesione allo studio in qualsiasi momento, comunicandolo al medico dello studio, la dottoressa *Giuseppina Sgandurra* senza fornire alcuna giustificazione. In tal caso non saranno raccolti ulteriori dati che ti riguardano e potrai chiedere la cancellazione di quelli già raccolti. La tua partecipazione allo studio potrà essere interrotta se il medico valuterà che il nuovo trattamento non ha portato alcun giovamento o se si verificheranno effetti indesiderati. In questi

casi sarai tempestivamente informato dal medico e potrai discutere con lui circa ulteriori trattamenti validi per la tua patologia.

### **Cosa accadrà alle informazioni che sono state raccolte per lo studio?**

Le informazioni mediche che ti riguardano come ad esempio l'età, il sesso, le caratteristiche della tua malattia, i risultati delle prove e il diario delle attività quotidiane saranno conservate presso un archivio della Fondazione Stella Maris.

I tuoi dati saranno archiviati in forma anonimizzata, il tuo nome sarà sostituito da un codice conosciuto solo da poche persone e quindi i tuoi dati saranno anonimi. Soltanto il medico e i soggetti autorizzati potranno collegare questo codice al tuo nominativo.

I dati dello studio potranno essere mostrati in occasione di convegni/congressi o pubblicati in riviste scientifiche per informare gli altri medici e i professionisti del settore sanitario.

### **Informazioni sui risultati dello studio**

Alla fine dello studio sarai informato sui risultati della ricerca.

### **Ulteriori informazioni**

Non sono previsti costi aggiuntivi a tuo carico derivanti dalla partecipazione allo studio.

Non riceverai alcun compenso economico per la partecipazione allo studio.

Il protocollo dello studio che ti è stato proposto è stato redatto in conformità alle Norme di Buona Pratica Clinica e alla Dichiarazione di Helsinki, ed è stato approvato dal Comitato Etico Pediatrico della Regione Toscana in data 22/11/2016.

**Per ulteriori informazioni e comunicazioni potrai contattare il personale dello studio che sarà a tua disposizione:**

|          |                         |            |
|----------|-------------------------|------------|
| Dr.ssa . | Sgandurra               | Giuseppina |
| Telefono | 050/886233              |            |
| E.mail   | gsgandurra@fsm.unipi.it |            |

\_\_\_\_\_  
Nome per esteso del medico  
che ha consegnato l'informativa

\_\_\_/\_\_\_/\_\_\_  
Data

\_\_\_\_\_  
Ora

\_\_\_\_\_  
Firma

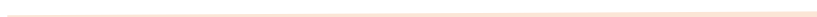

**MODULO DI CONSENSO**  
**PER PAZIENTI DI ETA' COMPRESA TRA 14 E 18 ANNI**  
*Versione 6.0 del 29/11/2016*

**Titolo Protocollo:** *Action-Observation Training (AOT) per la riabilitazione a domicilio di soggetti con emiplegia*

**Versione e data** *V 6.0 del 29/11/2016*

**Promotore dello studio:** *IRCCS Fondazione Stella Maris, Viale del Tirreno, 331. Calambrone (PI)*

**Sperimentatore Principale:** *Dr.ssa Giuseppina Sgandurra, IRCCS Fondazione Stella Maris; Viale del Tirreno 331; 56128 Calambrone (Pisa), Italia Tel 050/886233. e-mail: gsgandurra@fsm.unipi.it*

Io sottoscritto (nome e cognome) \_\_\_\_\_  
dichiaro di aver ricevuto dal Dottor \_\_\_\_\_ esaurienti spiegazioni  
in merito alla richiesta di partecipazione allo studio in oggetto, secondo quanto riportato nel modulo  
informativo allegato, della quale mi è stata consegnata una copia in data \_\_\_\_\_ alle ore  
\_\_\_\_\_

Dichiaro che mi sono stati chiaramente spiegati la natura, lo scopo, i benefici attesi, i rischi e gli  
inconvenienti possibili dello studio clinico.

Dichiaro di aver potuto fare tutte le domande che ho ritenuto necessarie e di aver ricevuto risposte  
soddisfacenti, come pure di aver avuto la possibilità di informarmi in merito ai particolari dello studio con  
persona di mia fiducia.

Accetto dunque liberamente di partecipare alla ricerca, avendo compreso completamente il significato  
della richiesta e i rischi e benefici che possono derivare da questa partecipazione.

Acconsento al trattamento dei miei dati personali e al loro trasferimento al di fuori dell'Unione europea (se  
applicabile) per gli scopi della ricerca nei limiti e con le modalità indicate nell'informativa fornitami con il  
presente documento.

Desidero che mi siano comunicati i risultati dello studio.

\_\_\_\_\_/\_\_\_\_\_/\_\_\_\_\_  
Data                      Ora                      Firma del paziente

\_\_\_\_\_/\_\_\_\_\_/\_\_\_\_\_  
Data                      Ora                      Firma del medico che ha informato il paziente e registrato il suo consenso



# FONDAZIONE STELLA MARIS - IRCCS

ISTITUTO DI RICOVERO E CURA A CARATTERE SCIENTIFICO  
OSPEDALE DI RILIEVO NAZIONALE E DI ALTA SPECIALIZZAZIONE  
PER LA NEUROPSICHIATRIA DELL'INFANZIA E DELL'ADOLESCENZA  
ISTITUTO DI RIABILITAZIONE PER PATOLOGIE NEUROPSICHIATRICHE

## PRESIDENTE

Avv. Giuliano Maffei  
segreteria: Tel. 050 886269

## DIRETTORE GENERALE

Dott. Roberto Cutajar  
segreteria: Tel. 050 886271

## DIRETTORE SCIENTIFICO

Prof. Giovanni Cioni  
segreteria: Tel. 050 886233

## DIRETTORE SANITARIO

Dott. Giuseppe De Vito  
segreteria: Tel. 050 886277

## DIPARTIMENTO OSPEDALIERO

segreteria: Tel. 050 886229

## Sede Amministrativa:

56128)  
Viale del Tirreno, 341/A-B-C  
angolo Via dei Frassini, 1  
Partita Iva 0012624 050 6

## Centralino:

Tel. 050 886111  
Fax 050 886202

sito web: [www.fsm.unipi.it](http://www.fsm.unipi.it)

## Sede Legale:

56027 SAN MINIATO (PISA)  
Piazza della Repubblica, 13

## ISTITUTO DI RIABILITAZIONE

CALAMBRONE (PISA)

Tel. 050 886236

## ISTITUTO DI RIABILITAZIONE

RESIDENZA SANITARIA

Montalto di Fauglia (PISA)

Tel. 050 886620

## ISTITUTO DI RIABILITAZIONE

RESIDENZA SANITARIA

“Casa Verde” S. Miniato (PISA)

Tel. 050 886661-0571 43289

## CENTRO DIURNO DI

RIABILITAZIONE PSICHIATRICA

La Scala di San Miniato (PI)

Tel. 0571 419868

**Gentile Sig.ra/Sig.re, le informazioni contenute nel seguente foglio informativo sono dettagliate e potrebbero risultare MOLTO COMPLESSE**

**Le chiediamo di accettare la partecipazione allo studio SOLO dopo avere letto con attenzione questo foglio informativo ed avere avuto un COLLOQUIO ESAURIENTE con il medico sperimentatore che le dovrà dedicare il TEMPO NECESSARIO per comprendere completamente ciò che le viene proposto**

## INFORMAZIONI SCRITTE

### PER IL PAZIENTE

Versione 5.0 del 10/11/2016

**Titolo Protocollo:** *Action-Observation Training (AOT) per la riabilitazione a domicilio di soggetti con emiplegia*

**Versione e data** V 5.0 del 10/11/2016

**Promotore dello studio:** IRCCS Fondazione Stella Maris, Viale del Tirreno, 331. Calambrone (PI)

**Sperimentatore Principale:** Dr.ssa Giuseppina Sgandurra, IRCCS Fondazione Stella Maris; Viale del Tirreno 331; 56128 Calambrone (Pisa), Italia Tel 050/886233. e-mail: [gsgandurra@fsm.unipi.it](mailto:gsgandurra@fsm.unipi.it)

Gentile Signora / Egregio Signore,

Le è stato chiesto di partecipare ad uno studio clinico sperimentale e questo documento ha lo scopo di informarLa sulla natura dello studio, sul fine che esso si propone, su ciò che comporterà per Lei una tale partecipazione, sui suoi diritti e le sue responsabilità.

La prego di leggere attentamente queste informazioni scritte prima di prendere una decisione in merito ad una eventuale Sua partecipazione allo studio. Lei avrà a disposizione tutto il tempo necessario per decidere se partecipare o meno.

Potrà, inoltre, porre liberamente qualsiasi domanda di chiarimento e riproporre ogni quesito che non abbia ricevuto una risposta chiara ed esauriente.

Nel caso in cui, dopo aver letto e compreso tutte le informazioni ivi fornite, decidesse di voler partecipare allo studio clinico, Le chiederò di voler firmare e personalmente datare il modulo di Consenso Informato allegato a questo documento.

### **Che cosa si propone lo studio**

Valutare la fattibilità e l'efficacia dell' Action Observation Training (AOT) rispetto alla standard care nella riabilitazione a domicilio dell'arto superiore in bambini con emiplegia.

Un secondo obiettivo sarà quello di misurare e monitorare i movimenti degli arti superiori tramite l'uso di attigrafi, strumenti semplici commerciali tipo orologi (vedi oltre), i cui dati verranno comparati con i risultati clinici.

### ***Che cosa è l'AOT***

La recente scoperta del Sistema dei Neuroni Specchio (SNS) ha favorito lo sviluppo dell' Action-Observation Training (AOT), una terapia che si basa sul ruolo dell'osservazione di azioni significative seguita dalla loro esecuzione come modello per l'apprendimento.

L'AOT è stato utilizzato con risultati promettenti in alcuni studi su pazienti adulti colpiti da ictus, recenti studi su bambini affetti da Paralisi Cerebrale Infantile indicano alcuni effetti positivi sulla funzione dell'arto superiore. In particolare, l'IRCCS Fondazione Stella Maris (FSM) ha negli anni scorsi effettuato in un gruppo di 24 bambini con emiplegia uno studio sull' AOT, **Errore. L'origine riferimento non è stata trovata.**I dati preliminari di tale studio supportano l'ipotesi che una riabilitazione intensiva basata sull' AOT è in grado di migliorare le attività con gli arti superiori dei bambini con emiplegia. Sulla base di tali promettenti risultati è stato proposto il presente studio.

La selezione dei soggetti e la sperimentazione clinica dei casi avverrà a cura della FSM.

Si intende selezionare 20 soggetti di età compresa tra 5-20 anni affetti da paralisi cerebrale infantile a tipo emiplegia con predominante quadro di spasticità che interferisce con la funzione dell'arto superiore; sufficiente capacità di cooperazione e di comprensione nelle attività da proporre; genitori o tutori legali o soggetti adulti con emiplegia disponibili a collaborare ad un programma riabilitativo intensivo domiciliare di 3 settimane consecutive.

Il reclutamento avverrà solo dopo firma del consenso alla partecipazione da parte dei soggetti e se minorenni anche dei genitori o tutori.

I soggetti arruolati saranno divisi in modo random (ossia casuale) in due gruppi: sperimentale e standard care/controllo. I soggetti allocati nel gruppo sperimentale inizieranno subito con l'AOT per un periodo di 3 settimane, mentre quelli del controllo o standard care proseguiranno quanto normalmente eseguono facendo un diario delle eventuali attività riabilitative che conducono.

Tutti i bambini saranno valutati prima (T0) e dopo (T1) il periodo di training sperimentale/standard care con scale e test standardizzati. Al termine di tale periodo a quei soggetti che non hanno effettuato il training sperimentale sarà data l'opportunità di effettuare il training. Il training sarà proposto con le stesse modalità del precedente e durerà 3 settimane a termine delle quali i soggetti di questo gruppo saranno rivalutati con scale e test standardizzati (T1 plus). Tutti i soggetti saranno rivalutati anche dopo 8 settimane da T1 (T2) e dopo 16 settimane da T1 (T3).

Le valutazioni saranno effettuate allo scopo di valutare gli effetti del training nel breve tempo (T1 e T1 plus) e nel medio (T2) e lungo tempo (T3). Per dettagli vedi Disegno dello studio Figura 1.



Figura 1: Disegno dello studio Clinico

Riassumendo tutti i soggetti arruolati saranno valutati con scale e test standardizzati in tempi differenti:

T0, T1, T2, T3.

- T0: nella settimana precedente all'avvio del training/standard care
- T1: nella settimana successiva al primo periodo di training sperimentale/standard care
- T1 plus: nella settimana successiva al training sperimentale. Questa valutazione sarà effettuata solo dal gruppo di soggetti che effettuerà il training nella seconda fase.
- T2: 8 settimane dalla fine del training sperimentale
- T3: 16 settimane dopo T2.

Il training di AOT sarà effettuato tramite piattaforma dedicata e personalizzata che verrà consegnata a casa insieme al materiale da utilizzare. Il trattamento verrà effettuato dai bambini, con la supervisione dei genitori, durerà circa un'ora al giorno per 5 giorni alla settimana per 3 settimane successive (totale di 15 giorni). I primi due/tre giorni del training un terapeuta coadiuverà a domicilio i genitori o i soggetti emiplegici adulti nella gestione del training.

Durante le tre le settimane di training verrà inoltre chiesto ai soggetti arruolati di indossare degli attigrafi commerciali (Figura 1) tutti i giorni per il maggior tempo possibile.

I soggetti che inizialmente verranno allocati nel gruppo controllo o standard care sarà chiesto di mantenere un diario delle eventuali attività riabilitative che conducono normalmente e sarà chiesto di indossare gli attigrafi tutti i giorni per il maggior tempo possibile, come i soggetti allocati al gruppo sperimentale.

Sarà chiesto di mantenere gli attigrafi anche nelle 3 settimane successive alla fine del training.

L'attigrafo è un sensore accelerometrico di movimento non invasivo che si indossa al polso come un orologio, è confortevole e resistente all'acqua. Oggigiorno gli attigrafi commerciali sono diventati strumenti di tendenza in uso da giovani ed adulti per il monitoraggio dell'attività fisica e del consumo calorico quotidiano. Il modello utilizzato nel presente studio è riportato nella foto di seguito.



Figura 2: wGT3X-BT

Il reclutamento avverrà solo dopo la firma del consenso informato.

Al reclutamento saranno acquisiti alcuni dati clinici (tra cui età, sesso, caratteristiche della lesione cerebrale, lato plegico, livello di funzionalità manuale all'House Functional Classification System) e sarà creato un apposito database.

A tutela della privacy e dell'anonimato a ciascun soggetto sarà assegnato un codice numerico che verrà conservato in forma separata, in questo modo il database non conterrà nessun dato identificativo del soggetto. L'accesso a tali dati sarà limitato al solo personale direttamente coinvolto nello studio e tutti i dati verranno trattati in forma anonima.

#### **Cosa comporta la Sua partecipazione allo studio**

Lo studio avrà una durata totale di 12 mesi, durante tale periodo saranno arruolati presso l'IRCCS Fondazione Stella Maris un gruppo di 20 bambini/adolescenti e giovani adulti (5-20 anni) con emiplegia congenita. La partecipazione sarà su base volontaria, previa firma del consenso informato. Lo studio prevederà un intervento riabilitativo della funzione manuale a domicilio tramite una piattaforma costruita ad hoc che consentirà di effettuare un training personalizzato di AOT.

Lo studio prevede lo svolgimento di test e questionari clinici, normalmente impiegati per la valutazione funzionale dell'emiplegia congenita:

Il protocollo consisterà nei seguenti test:



1- Assisting Hand Assessment (AHA) una scala, che attraverso la proposta di attività ludico-ricreative, consente di valutare la funzionalità manuale e bimanuale.

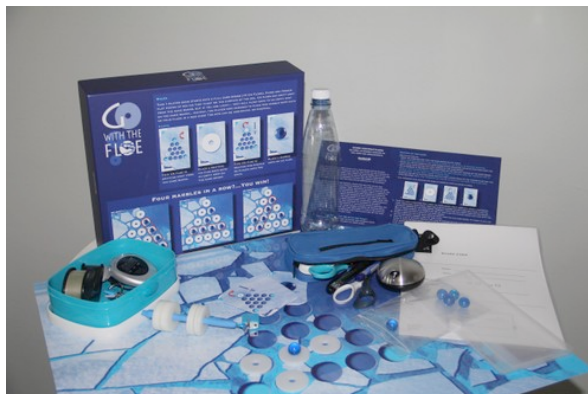

2- Box and Block Test (BBT) E' una misura per la valutazione della destrezza manuale in cui viene richiesto prima con una mano poi con l'altra di spostare i cubi da un lato della scatola all'altro in 60 secondi.

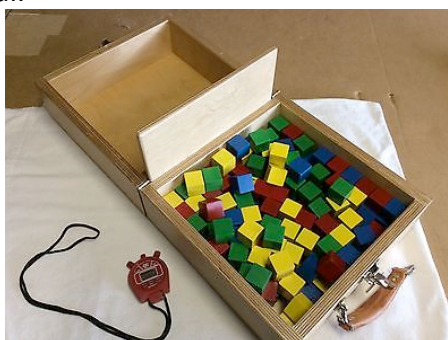

3- *Melbourne Assessment of Upper Limb Function (MUUL)*. Si tratta di uno strumento standardizzato per la misurazione della capacità e qualità di movimento dell'arto superiore nei bambini con Paralisi Cerebrale Infantile di età compresa tra i 2 e i 15 anni, ma utilizzati anche per l'età adulta. Verrà utilizzato a tutti i tempi di valutazione.

4- *L'ABILHAND* è un breve questionario, validato in soggetti con paralisi cerebrale infantile che misura 21 principali attività quotidiane bimanuali. Il punteggio viene assegnato da soggetto stesso in base alla difficoltà che sperimenta nel compiere quotidianamente l'attività richiesta con un punteggio su 3 punti (impossibile, difficile, facile). Verrà utilizzato a tutti i tempi di valutazione.

5- *Participation and Environment Measure - Children and Youth (PEM-CY)*. Si tratta di una misura di participation e di fattori ambientali a casa, a scuola e nella comunità. Verrà utilizzato a T0 e a T3.

6- *Cerebral Palsy Quality of Life Questionnaire for Children (CP QOL –Child, 4-12 years) and Cerebral Palsy Quality of Life Questionnaire for Adolescents (CP QOL –Teen, 13-18 years)*. Si tratta di questionari per la valutazione della qualità della vita in soggetti con paralisi cerebrale infantile. Verrà utilizzato a T0 e a T3.

7- *Misurazione strumentale della manipolazione durante task uni e bimanuali eseguiti dopo osservazione.* Si tratta di un oggetto contenente due celle di carico per misurare la forza esercitata (in compressione o trazione) quando viene afferrato dalla mano plegica e uno switch on-off per valutare il contatto della mano sana. Un ulteriore switch è posizionato sul punto di partenza sul tavolo sotto la mano plegica per registrare il momento in cui inizia il suo movimento verso l'oggetto. Lo strumento viene utilizzato subito dopo la visione di tre task di manipolazione effettuati con tre diversi tipi di presa: un task unimanuale effettuato con la mano plegica, un task bimanuale sincrono tra le due mani ed un task bimanuale di cooperazione tra le due mani.

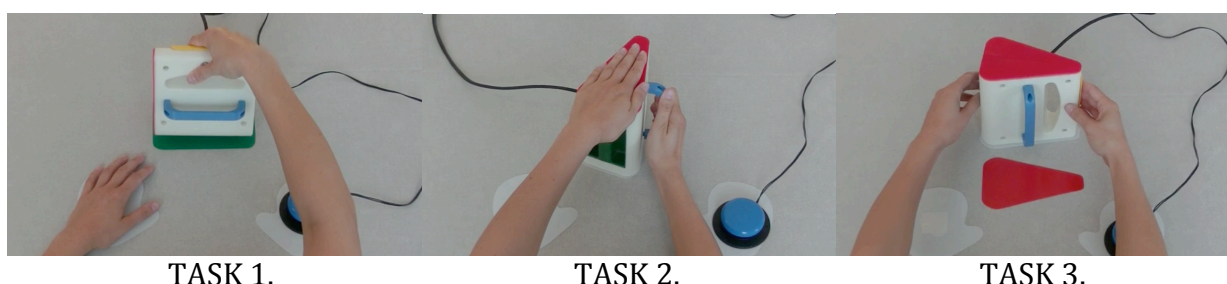

L'intera valutazione durerà circa un'ora.

8- *Uso dell'attigrafo nella vita quotidiana.* I soggetti reclutati che saranno disponibili ad indossare l'attigrafo (Figura 2) al di fuori della valutazione clinica sarà chiesto di indossare 2 attigrafi ai polsi (uno per ciascun polso) per periodi di tre settimane (fase sperimentale AOT, fase controllo, fase di follow-up). Al termine del periodo di registrazione gli attigrafi si spengeranno da soli e saranno riconsegnati direttamente o tramite posta allo sperimentatore.

### **Benefici derivanti dalla partecipazione allo studio**

Sulla base dei dati della letteratura e sui risultati preliminari ottenuti presso il Ns Istituto si prevede, grazie al training di AOT, un possibile miglioramento funzionale nell'utilizzo dell'arto superiore nelle attività di vita quotidiana.

### **Possibili rischi**

Non si prevedono rischi diretti dalla partecipazione allo studio.

### **Possibili alternative**

L'alternativa è non partecipare allo studio.

### **Che cosa succede se decidete di non prendere parte allo studio o di ritirarvi dallo studio**

La partecipazione allo studio è volontaria. Se decide di partecipare, avrà il diritto di ritirarsi dallo studio in qualsiasi momento e senza l'obbligo di fornire spiegazioni, dandone tuttavia comunicazione al medico responsabile dello studio, la Dr.ssa Giuseppina Sgandurra.

Potrà ritirare la sua adesione allo studio in un qualsiasi momento dandone comunicazione al

medico dello studio, alla Dr.ssa Giuseppina Sgandurra, senza fornire alcuna giustificazione. In tal caso non saranno raccolti ulteriori dati che lo/a riguardano e potrete chiedere la cancellazione di quelli già raccolti.

### **Consenso ad informare il proprio medico di medicina generale**

Per la migliore tutela della Sua salute, Le verrà chiesto di informare il Suo medico di medicina generale in merito alla sperimentazione alla quale accetta di partecipare.

### **Informazioni circa i risultati dello studio**

Se Lei lo richiederà, alla fine dello studio potranno esserLe comunicati i risultati generali dello studio ed in particolare quelli che La riguardano.

---

## **INFORMAZIONI IN MERITO AL TRATTAMENTO DEI DATI PERSONALI:**

### **Titolari del trattamento e relative finalità**

Il Centro di sperimentazione IRCCS Fondazione Stella Maris e in accordo alle responsabilità previste dalle norme della buona pratica, tratteranno i Suoi dati personali, in particolare quelli sulla salute e, soltanto nella misura in cui sono indispensabili in relazione all'obiettivo dello studio, altri dati relativi alla Sua origine ed alle caratteristiche della sua condizione medica solo esclusivamente in funzione della realizzazione dello studio. A tal fine i dati indicati saranno raccolti dal Centro di sperimentazione e trattati in modo anonimo e a tutela della privacy. Il trattamento dei dati personali relativi all'età, sesso, lato plegico/dominanza manuale, funzionalità manuale, attività quotidiane svolte, dati provenienti dalle registrazioni attigrafiche sono indispensabili allo svolgimento dello studio: il rifiuto di conferirli non Le consentirà di parteciparvi.

### **Natura dei dati**

Il medico che La seguirà nello studio La identificherà con un codice: i dati che La riguardano raccolti nel corso dello studio, ad eccezione del Suo nominativo, saranno registrati, elaborati e conservati, per almeno 7 (sette) anni dalla conclusione dello studio, unitamente a tale codice, alla Sua data di nascita, l'età, sesso, lato plegico/dominanza manuale, funzionalità manuale, attività quotidiane svolte, dati provenienti dalle registrazioni attigrafiche sono necessari allo svolgimento dello studio. Soltanto il medico e i soggetti autorizzati potranno collegare questo codice al Suo nominativo.

### **Modalità del trattamento**

I dati, trattati mediante strumenti anche elettronici, saranno diffusi solo in forma rigorosamente anonima, ad esempio attraverso pubblicazioni scientifiche, statistiche e convegni scientifici. La Sua partecipazione allo studio implica che il Comitato etico e le autorità sanitarie italiane e straniere potranno conoscere i dati che La riguardano, contenuti anche nella Sua documentazione clinica originale, con modalità tali da garantire la riservatezza della Sua identità.

### **Esercizio dei diritti**

Potrà esercitare i diritti di cui all'art. 7 del Codice (es. accedere ai Suoi dati personali, integrarli, aggiornarli, rettificarli, opporsi al loro trattamento per motivi legittimi, ecc.) rivolgendosi

direttamente al centro di sperimentazione nella persona della Dott.ssa Giuseppina Sgandurra. Potrà interrompere in ogni momento e senza fornire alcuna giustificazione la Sua partecipazione allo studio. In tal caso, i dati acquisiti a Lei correlati verranno distrutti. Non saranno inoltre raccolti ulteriori dati che La riguardano, ferma restando l'utilizzazione di quelli eventualmente già raccolti per determinare, senza alterarli, i risultati della ricerca: anche per i dati già raccolti potrà eventualmente chiedere la cancellazione.

---

### Ulteriori informazioni

Non sono previsti costi a Suo carico derivanti dalla partecipazione allo studio. Non riceverà alcun compenso economico per la partecipazione allo studio.

Il protocollo dello studio che Le è stato proposto è stato approvato dal Comitato Etico Pediatrico Toscano in data..... Il Comitato Etico ha tra le altre cose verificato la conformità dello studio alle Norme di Buona Pratica Clinica della Unione Europea ed ai principi etici espressi nelle Dichiarazione di Helsinki.

Lei potrà segnalare qualsiasi fatto ritenga opportuno evidenziare, relativamente alla ricerca che La riguarda, al Comitato Etico e/o alla Direzione Sanitaria di questa struttura ospedaliera.

|          |                          |            |
|----------|--------------------------|------------|
| Dr.ssa . | Sgandurra                | Giuseppina |
| Telefono | 050/886233               |            |
| E.mail   | g.sgandurra@fsm.unipi.it |            |

\_\_\_\_\_  
Nome per esteso del medico  
che ha consegnato l'informativa

\_\_\_/\_\_\_/\_\_\_  
Data

\_\_\_\_\_  
Ora

\_\_\_\_\_  
Firma

## **MODULO DI CONSENSO INFORMATO**

V 5.0 del 10/11/2016

**Titolo Protocollo:** *Action-Observation Training (AOT) per la riabilitazione a domicilio di soggetti con emiplegia*

**Versione e data** V 5.0 del 10/11/2016

**Promotore dello studio:** IRCCS Fondazione Stella Maris, Viale del Tirreno, 331. Calambrone (PI)

**Sperimentatore Principale:** Dr.ssa Giuseppina Sgandurra, IRCCS Fondazione Stella Maris; Viale del Tirreno 331; 56128 Calambrone (Pisa), Italia Tel 050/886233. e-mail: gsgandurra@fsm.unipi.it

Io sottoscritto/a \_\_\_\_\_ nato/a il \_\_\_/\_\_\_/\_\_\_\_\_  
residente a \_\_\_\_\_ via/piazza \_\_\_\_\_  
Tel. \_\_\_\_\_ domicilio (se diverso dalla residenza) \_\_\_\_\_

### **DICHIARO**

- di aver ricevuto dal Dottor \_\_\_\_\_ esaurienti spiegazioni in merito alla richiesta di partecipazione alla ricerca in oggetto, secondo quanto riportato nella scheda informativa, facente parte di questo consenso, della quale mi è stata consegnata una copia in data \_\_\_\_\_ alle ore \_\_\_\_\_ (*indicare data e ora della consegna*);
- che mi sono stati chiaramente spiegati e di aver compreso la natura, le finalità, le procedure, i benefici attesi, i rischi e gli inconvenienti possibili e le alternative dello studio clinico;
- di aver avuto l'opportunità di porre domande chiarificatrici e di aver avuto risposte soddisfacenti;
- di aver avuto tutto il tempo necessario prima di decidere se partecipare o meno;
- di non aver avuto alcuna coercizione indebita nella richiesta del Consenso;
- che mi è stato chiaramente spiegato di poter decidere liberamente di non prendere parte allo studio o di uscirne in qualsiasi momento senza fornire giustificazione, e che tali decisioni non modificheranno in alcun modo i rapporti con i medici curanti e con la struttura presso la quale sono in cura;
- di essere consapevole dell'importanza (e della mia responsabilità) di informare il mio medico di medicina generale della sperimentazione alla quale accetto di partecipare; nel caso decida di non informarlo, esonero sia il mio medico curante che i medici che mi seguono nella sperimentazione dalla responsabilità per i danni che possano derivare dall'incompatibilità tra il(i) farmaco(i) in studio ed altri trattamenti medici.

Sottoscrivendo questo modulo acconsento al trattamento dei miei dati personali per gli scopi della ricerca nei limiti e con le modalità indicate nell'informativa fornitami con il presente documento.

### **DICHIARO pertanto di**

- volere**                       **NON volere**  
partecipare alla  sola fase di valutazione clinica  
 sia alla fase di valutazione clinica che a domicilio

**volere**       **NON volere**

essere informato sui risultati di questa ricerca dal medico dello studio

**volere**       **NON volere**

essere informato sui risultati della ricerca dal medico dello studio, anche in relazione alle notizie inattese che dovessero essere accidentalmente riscontrate con le indagini previste dallo studio

**volere**       **NON volere**

Informare il medico di medicina generale della partecipazione allo studio

\_\_\_\_\_/\_\_\_\_\_/\_\_\_\_\_  
Nome per esteso del paziente (adulto, minore maturo)      Data      Ora      Firma

\_\_\_\_\_/\_\_\_\_\_/\_\_\_\_\_  
Nome per esteso rappresentante legale      Data      Ora      Firma

Io sottoscritto Prof./Dr.

.....  
Cognome

.....  
Nome

Dichiaro che il Paziente ha firmato spontaneamente la sua partecipazione allo studio

Dichiaro inoltre di:

- aver fornito al Paziente esaurienti spiegazioni in merito alle finalità dello studio, alle procedure, ai possibili rischi e benefici e alle sue possibili alternative;
- aver verificato che il Paziente abbia sufficientemente compreso le informazioni fornitegli
- aver lasciato al Paziente il tempo necessario e la possibilità di fare domande in merito allo studio
- non aver esercitato alcuna coercizione od influenza indebita nella richiesta del Consenso

\_\_\_\_\_/\_\_\_\_\_/\_\_\_\_\_  
Nome per esteso del medico      Data      Ora      Firma  
che ha fornito le informazioni e  
raccolto il consenso informato

**NOTA BENE**

una copia del presente modulo, firmato e datato, allegato alle “Informazioni Scritte per il Paziente” dovrà essere consegnata al Paziente stesso



# FONDAZIONE STELLA MARIS - IRCCS

ISTITUTO DI RICOVERO E CURA A CARATTERE SCIENTIFICO  
OSPEDALE DI RILIEVO NAZIONALE E DI ALTA SPECIALIZZAZIONE  
PER LA NEUROPSICHIATRIA DELL'INFANZIA E DELL'ADOLESCENZA  
ISTITUTO DI RIABILITAZIONE PER PATOLOGIE NEUROPSICHIATRICHE

## PRESIDENTE

Avv. Giuliano Maffei  
segreteria: Tel. 050 886269

## DIRETTORE GENERALE

Dott. Roberto Cutajar  
segreteria: Tel. 050 886271

## DIRETTORE SCIENTIFICO

Prof. Giovanni Cioni  
segreteria: Tel. 050 886233

## DIRETTORE SANITARIO

Dott. Giuseppe De Vito  
segreteria: Tel. 050 886277

## DIPARTIMENTO OSPEDALIERO

segreteria: Tel. 050 886229

## Sede Amministrativa:

56128)  
Viale del Tirreno, 341/A-B-C  
angolo Via dei Frassini, 1  
Partita Iva 0012624 050 6

## Centralino:

Tel. 050 886111  
Fax 050 886202

sito web: [www.fsm.unipi.it](http://www.fsm.unipi.it)

## Sede Legale:

56027 SAN MINIATO (PISA)  
Piazza della Repubblica, 13

## ISTITUTO DI RIABILITAZIONE

CALAMBRONE (PISA)  
Tel. 050 886236

## ISTITUTO DI RIABILITAZIONE

RESIDENZA SANITARIA  
Montalto di Fauglia (PISA)  
Tel. 050 886620

## ISTITUTO DI RIABILITAZIONE

RESIDENZA SANITARIA  
"Casa Verde" S. Miniato (PISA)  
Tel. 050 886661-0571 43289

## CENTRO DIURNO DI

RIABILITAZIONE PSICHIATRICA  
La Scala di San Miniato (PI)  
Tel. 0571 419868

## INFORMATIVA E MANIFESTAZIONE DEL CONSENSO AL TRATTAMENTO DEI DATI PERSONALI

### **Titolo Protocollo**

*Action-Observation Training (AOT) per la riabilitazione a domicilio di soggetti con emiplegia*

**Versione e data** V 5.0 del 10/11/2016

**Promotore dello studio:** IRCCS Fondazione Stella Maris, Viale del Tirreno, 331. Calambrone (PI)

**Sperimentatore Principale:** Dr.ssa Giuseppina Sgandurra, IRCCS Fondazione Stella Maris; Viale del Tirreno 331; 56128 Calambrone (Pisa), Italia Tel 050/886233.  
e-mail: [g.sgandurra@fsm.unipi.it](mailto:g.sgandurra@fsm.unipi.it)

### **Titolari del trattamento e relative finalità**

Il Centro di sperimentazione IRCCS Fondazione Stella Maris in accordo alle responsabilità previste dalle norme della buona pratica clinica (decreto-legge n. 211/2003), tratteranno i Suoi dati personali, in particolare quelli sulla salute e, soltanto nella misura in cui sono indispensabili in relazione all'obiettivo dello studio, altri dati relativi alla Sua origine esclusivamente in funzione della realizzazione dello studio.

Il trattamento dei dati personali relativi tra cui età, sesso, lato plegico/dominanza manuale, livello di funzionalità manuale, misure ottenuti dai test di funzionalità manuale, attività quotidiane svolte, dati provenienti dalle registrazioni attigrafiche sono necessari allo svolgimento dello studio: il rifiuto di conferirli non Le consentirà di parteciparvi.

### **Natura dei dati**

Il medico che La seguirà nello studio La identificherà con un codice: i dati che La riguardano, raccolti nel corso dello studio, ad eccezione del Suo nominativo, saranno registrati, elaborati e conservati unitamente a tale codice, alla Sua data di nascita, al sesso, lato plegico/dominanza manuale, livello di funzionalità manuale, misure ottenuti dai test di funzionalità manuale, attività quotidiane svolte, dati provenienti dalle registrazioni attigrafiche sono necessari allo svolgimento dello studio. Soltanto il medico e i soggetti autorizzati potranno collegare questo codice al Suo nominativo.

### **Modalità del trattamento**

I dati, trattati mediante strumenti anche elettronici, saranno diffusi solo in forma rigorosamente anonima, ad esempio attraverso pubblicazioni scientifiche, statistiche e convegni scientifici. La Sua partecipazione allo studio implica che, il Comitato etico e le autorità sanitarie italiane e straniere potranno conoscere i dati che La riguardano, contenuti anche nella Sua documentazione clinica originale, con modalità tali da garantire la riservatezza della Sua identità.



**Esercizio dei diritti**

Potrà esercitare i diritti di cui all'art. 7 del Codice (es. accedere ai Suoi dati personali, integrarli, aggiornarli, rettificarli, opporsi al loro trattamento per motivi legittimi, ecc.) rivolgendosi direttamente al centro di sperimentazione. Sperimentatore principale Dr.ssa Giuseppina Sgandurra , IRCCS Fondazione Stella Maris. Viale del Tirreno 331, 56128 Calambrone (Pisa), *g.sgandurra@fsm.unipi.it*. Potrà interrompere in ogni momento e senza fornire alcuna giustificazione la Sua partecipazione allo studio. Non saranno inoltre raccolti ulteriori dati che La riguardano, ferma restando l'utilizzazione di quelli eventualmente già raccolti per determinare, senza alterarli, i risultati della ricerca.

**Consenso**

Sottoscrivendo tale modulo acconsento al trattamento dei miei dati personali per gli scopi della ricerca nei limiti e con le modalità indicate nell'informativa fornitami con il presente documento.

Nome e Cognome dell'interessato (in stampatello) \_\_\_\_\_

Firma dell'interessato \_\_\_\_\_

Data \_\_\_\_\_
