# Supplementary material for: Tele-UPCAT: study protocol of a randomised controlled trial of a home-based Tele-monitored UPper limb Children Action observation Training for participants with unilateral cerebral palsy
Source: PubMed Central journal article supplement — BMJ Open. 2018 May 14;8(5):e017819. doi: 10.1136/bmjopen-2017-017819 (PMC5961615; doi:10.1136/bmjopen-2017-017819), 2018-05-14
Supplement: bmjopen-2017-017819supp003.pdf [file bmjopen-2017-017819supp003.pdf]

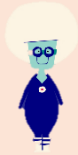

## Semi-structured qualitative interview about acceptability of AOT training

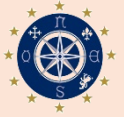

Answer to these questions with your parents, feel free to add your comments

### Customization of exercises

|   |                                                                                                 |                  |                   |    |
|---|-------------------------------------------------------------------------------------------------|------------------|-------------------|----|
| 1 | Did the exercises seem suitable for you (materials, type of actions...)?                        | yes, at all      | yes, in part      | no |
| 2 | Were exercises difficult for you (required performance)?                                        | yes, all of them | yes, many of them | no |
| 3 | Did you notice an increasing difficulty (from the easiest the first day to the most difficult)? | yes              |                   | no |
| 4 | Did exercises seem like other typical activities/daily life actions?                            | yes, all of them | yes, many of them | no |
| 5 | Do you think that AOT activities had a role in promoting your ability?                          | yes, at all      | yes, in part      | no |

### Suitability of children with UCP for the Tele-UPCAT system in their own home

|   |                                                        |             |              |    |
|---|--------------------------------------------------------|-------------|--------------|----|
| 6 | Did you like to do the training at home?               | yes         |              | no |
| 7 | Did you like to perform exercises without a therapist? | yes, at all | yes, in part | no |
| 8 | Who helped you for the training?                       |             |              |    |

### Feasibility at home

|    |                                                            |             |              |    |
|----|------------------------------------------------------------|-------------|--------------|----|
| 9  | Did you have a suitable table where the system was placed? | yes         |              | no |
| 10 | If no, did you need to re-organize your home space?        | yes, at all | yes, in part |    |
| 11 | Do you judge the whole system bulky?                       | yes         |              | no |
| 12 | Was the management of the system difficult?                | yes, at all | yes, in part | no |

### Required effort by the participants

|    |                                                                      |             |              |    |
|----|----------------------------------------------------------------------|-------------|--------------|----|
| 13 | Was the effort (about 1 hour per day) feasible for you?              | yes, at all | yes, in part | no |
| 14 | Did you change your daily routine to do the training?                | yes, at all | yes, in part | no |
| 15 | Did you have to renounce to something (sport, freetime, holidays..)? | yes, at all | yes, in part | no |
| 16 | Did you like to have a fixed time for the training each day?         | yes, at all | yes, in part | no |
| 17 | Do you think that you could proceed the training for more days?      | yes, at all | yes, in part | no |
| 18 | Were the exercises too hard (difficult, long..) for you?             | yes, at all | yes, in part | no |



## Semi-structured qualitative interview about acceptability of AOT training



Answer to these questions with your parents, feel free to add your comments

### Acceptability of Actigraphs

|    |                                                  |             |                |    |
|----|--------------------------------------------------|-------------|----------------|----|
| 19 | Did you like to wear Actigraphs?                 | yes         |                | no |
| 20 | Did Actigraphs annoy you?                        | yes         | yes, sometimes | no |
| 21 | Did you wear them for the whole day?             | yes, at all | yes, in part   | no |
| 22 | Did you remember how to wear them (orientation)? | yes         |                | no |
| 23 | Did you remember to fill in your diary?          | yes         | yes, sometimes | no |

### Suitability of the manual

|    |                                                                          |             |                |    |
|----|--------------------------------------------------------------------------|-------------|----------------|----|
| 24 | Was the manual enough clear?                                             | yes, at all | yes, in part   | no |
| 25 | Did you have any difficulties in finding/preparing the material?         | yes         | yes, sometimes | no |
| 26 | Were the instructions for the managing of the system complete and clear? | yes         | yes, sometimes | no |

### Software

|    |                                                           |             |                |    |
|----|-----------------------------------------------------------|-------------|----------------|----|
| 27 | Did you like Ubi (for children)/slides (for adolescents)? | yes, at all | yes, in part   | no |
| 28 | Do you think that something need to be changed?           | yes         |                | no |
| 29 | Was the managing of the software difficult?               | yes, at all | yes, in part   | no |
| 30 | Did you have technical issues/troubles?                   | yes         | yes, sometimes | no |
| 31 | Did you need technical assistance?                        | yes         | yes, sometimes | no |
